# Supplementary material
Source: PubMed Central journal article supplement (PMC7035954)
Supplement: EMS85827-supplement-Supporting_information.pdf [file EMS85827-supplement-Supporting_information.pdf]

## Supporting Information

**Table S1.** Tukey test results following ANOVA tests to examine the influence of environment and strain on the rate of genome size change.

### Haploids

| Environment | Change      | Group |
|-------------|-------------|-------|
| SDC         | 98.0 ± 40.0 | a     |
| SD          | 3.5 ± 6.2   | c     |
| Pdep        | 10.5 ± 21.6 | c     |
| Ndep        | 63.3 ± 25.2 | b     |

### Diploids

| Environment | Change      | Group |
|-------------|-------------|-------|
| SDC         | -3.5 ± 9.5  | b     |
| SD          | -0.9 ± 4.0  | b     |
| Pdep        | 12.6 ± 37.5 | a     |
| Ndep        | -4.1 ± 3.4  | b     |

| Line | Change     | Group |
|------|------------|-------|
| 2N1  | 9.8 ± 32.6 | a     |
| 2N2  | -5.3 ± 9.0 | b     |
| 2N3  | -1.1 ± 3.4 | b     |

### Tetraploids

| Environment | Change       | Group |
|-------------|--------------|-------|
| SDC         | -42.2 ± 50.4 | a     |
| SD          | -79.4 ± 45.0 | c     |
| Pdep        | -77.1 ± 64.1 | bc    |
| Ndep        | -58.5 ± 61.6 | ab    |

| Line | Change        | Group |
|------|---------------|-------|
| 4N1  | -126.9 ± 34.1 | b     |
| 4N2  | -35.9 ± 51.7  | a     |
| 4N3  | -44.5 ± 45.7  | a     |
| 4N4  | -49.3 ± 44.9  | a     |

## Supporting Information

**Table S2. Least square means pairwise posthoc tests to determine the influence of evolutionary environment on change in growth rate.** Degree of freedom was 342 in all tests.**Haploids**

SE = 0.0142

| Contrast  | estimate | t ratio | p value  |
|-----------|----------|---------|----------|
| Ndep-Pdep | 0.0460   | 3.236   | 0.007    |
| Ndep-MM   | 0.0462   | 3.250   | 0.007    |
| Ndep-SDC  | -0.083   | -5.855  | < 0.0001 |
| Pdep-MM   | 0.0002   | 0.014   | 1.000    |
| Pdep-SDC  | -0.129   | -9.091  | < 0.0001 |
| MM-SDC    | -0.130   | -9.105  | < 0.0001 |

**Diploids**

SE = 0.0112

| Contrast  | estimate | t ratio | p value  |
|-----------|----------|---------|----------|
| Ndep-Pdep | -0.041   | -3.537  | 0.003    |
| Ndep-MM   | -0.053   | -4.536  | < 0.0001 |
| Ndep-SDC  | -0.037   | -3.203  | 0.0081   |
| Pdep-MM   | -0.012   | -0.999  | 0.750    |
| Pdep-SDC  | 0.004    | 0.334   | 0.987    |
| MM-SDC    | 0.016    | 1.334   | 0.541    |

**Polyploids**

SE = 0.0101

| Contrast  | estimate | t ratio | p value  |
|-----------|----------|---------|----------|
| Ndep-Pdep | 0.1000   | 9.912   | <0.0001  |
| Ndep-MM   | 0.0838   | 8.326   | < 0.0001 |
| Ndep-SDC  | 0.0988   | 9.817   | < 0.0001 |
| Pdep-MM   | -0.0159  | -1.585  | 0.388    |
| Pdep-SDC  | -0.0010  | -0.095  | 1.000    |
| MM-SDC    | 0.0150   | 1.490   | 0.444    |

## Supporting Information

**Table S3. Least square means pairwise posthoc tests to determine the influence of evolutionary environment on change in yield.** Degree of freedom was 342 in all tests.**Haploids**

SE = 0.0142

| Contrast  | estimate | t ratio | p value  |
|-----------|----------|---------|----------|
| Ndep-Pdep | 0.301    | 6.213   | <0.0001  |
| Ndep-MM   | 315      | 6.502   | < 0.0001 |
| Ndep-SDC  | -0.371   | -7.650  | < 0.0001 |
| Pdep-MM   | 0.014    | 0.289   | 0.992    |
| Pdep-SDC  | -0.672   | -13.863 | < 0.0001 |
| MM-SDC    | -0.686   | -14.152 | < 0.0001 |

**Diploids**

SE = 0.0112

| Contrast  | estimate | t ratio | p value |
|-----------|----------|---------|---------|
| Ndep-Pdep | -0.003   | -0.033  | 1.000   |
| Ndep-MM   | -0.025   | -0.636  | 0.920   |
| Ndep-SDC  | -0.105   | -2.645  | 0.042   |
| Pdep-MM   | -0.024   | -0.603  | 0.931   |
| Pdep-SDC  | -0.103   | -2.613  | 0.046   |
| MM-SDC    | -0.080   | -2.009  | 0.187   |

**Polyploids**

SE = 0.0101

| Contrast  | estimate | t ratio | p value  |
|-----------|----------|---------|----------|
| Ndep-Pdep | 0.252    | 7.375   | <0.0001  |
| Ndep-MM   | 0.190    | 5.551   | < 0.0001 |
| Ndep-SDC  | 0.211    | 6.155   | < 0.0001 |
| Pdep-MM   | -0.062   | -1.824  | 0.264    |
| Pdep-SDC  | -0.042   | -1.220  | 0.615    |
| MM-SDC    | 0.021    | 0.603   | 0.931    |

## Supporting Information

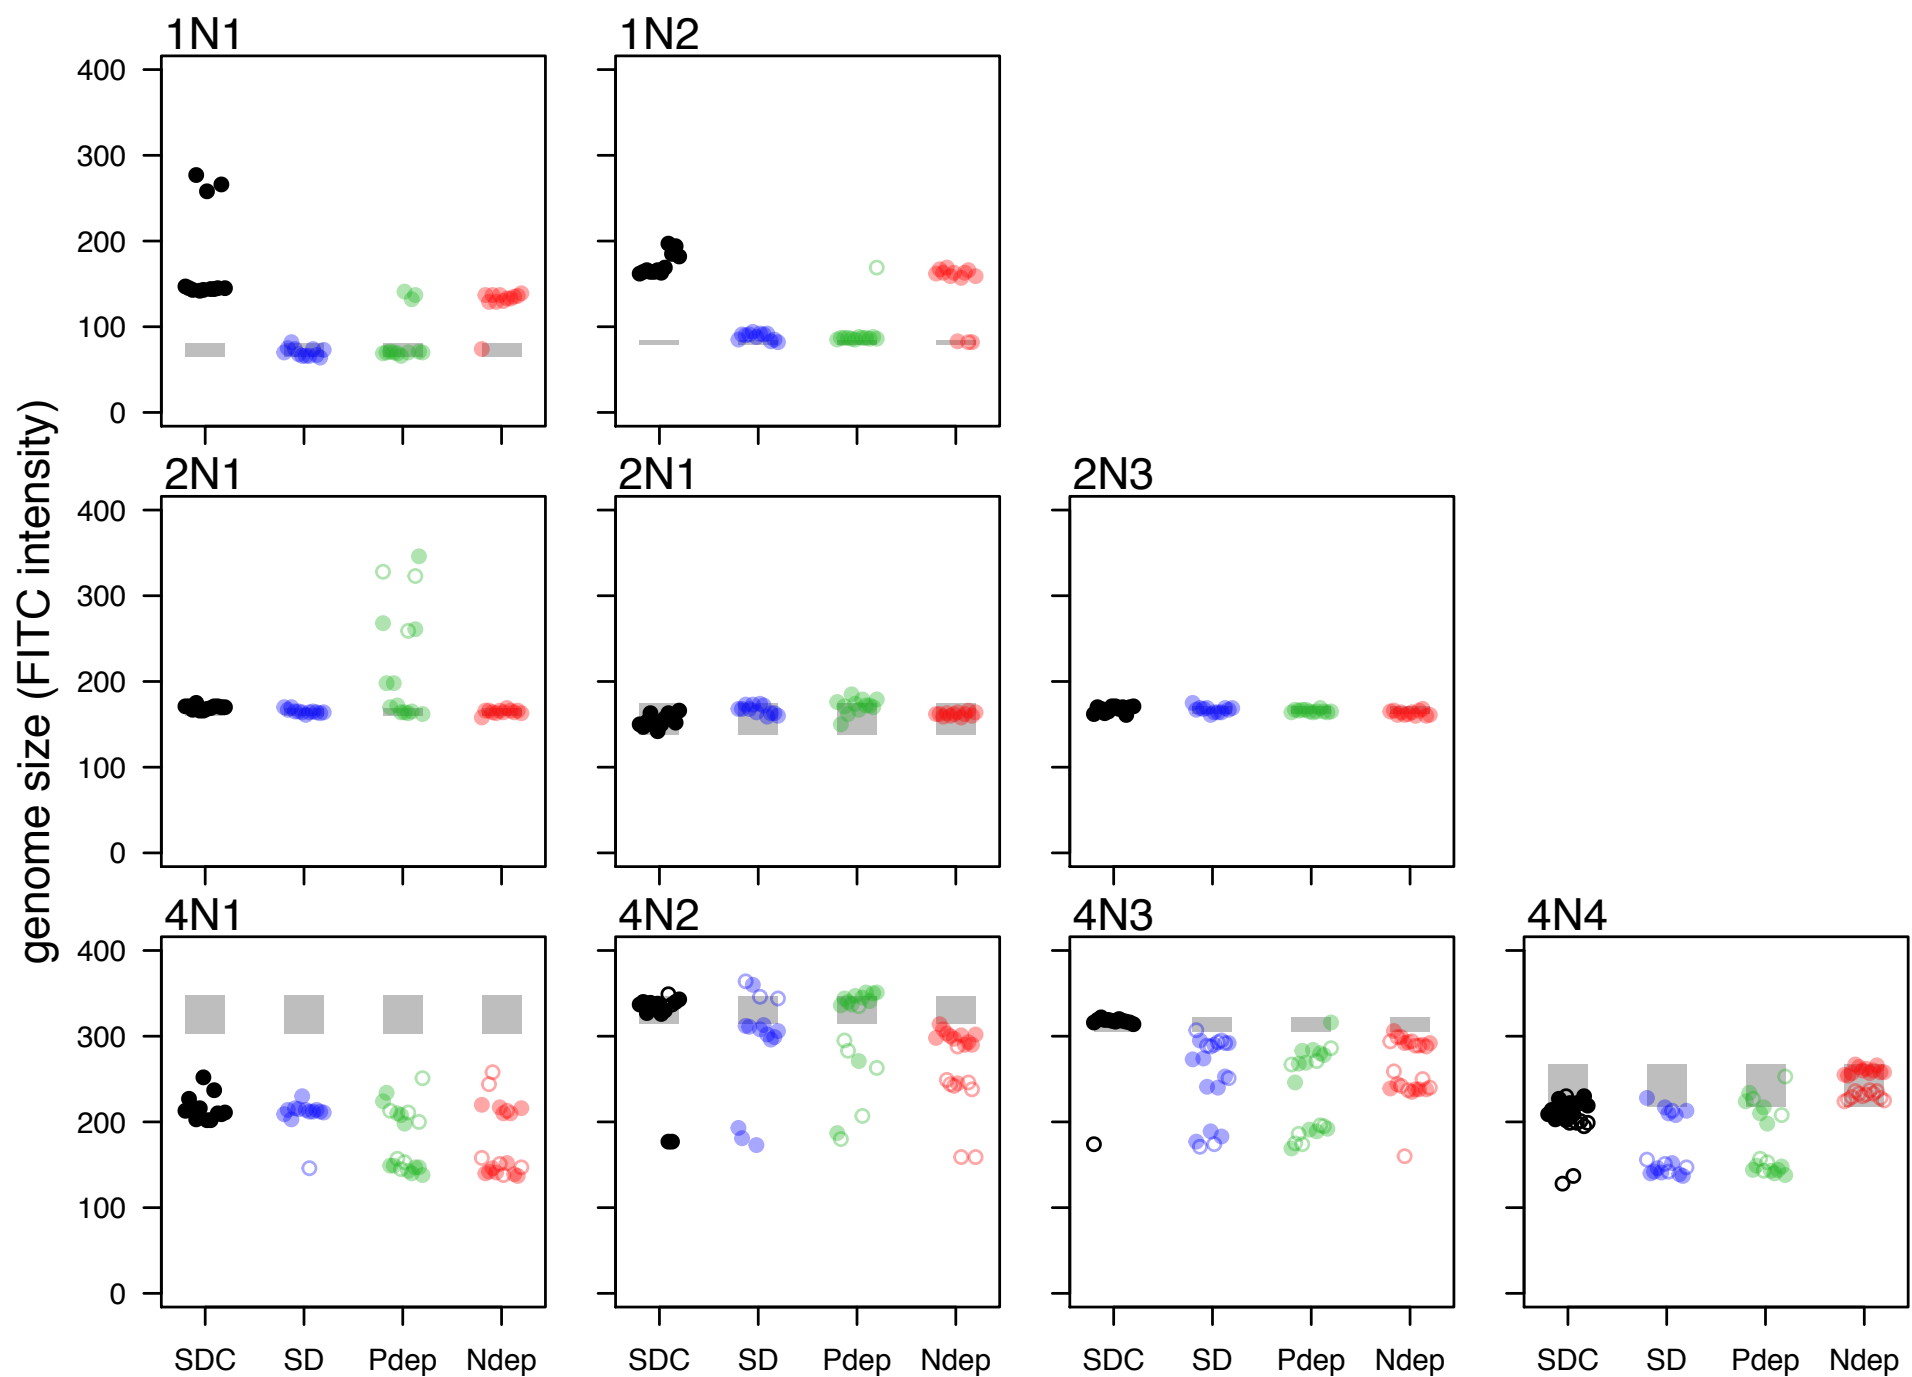

**Figure S1. Strain background and environment influence genome stability.** Twelve lines of each ancestral strain were evolved in complete (SDC, black points), minimal (MM, blue), phosphorus-deprivation (Pdep, green) and nitrogen-deprivation (Ndep, red) medium. Filled points represent the major peak and hollow points indicate the minor peaks in FITC intensity (see Figure 1) after ~140 generations of evolution. Top row = initially haploid lines; middle row = initially diploid lines; bottom row = initially polyploid lines. Grey boxes indicate the genome size range measured from twelve ancestral replicates for each strain.

## Supporting Information

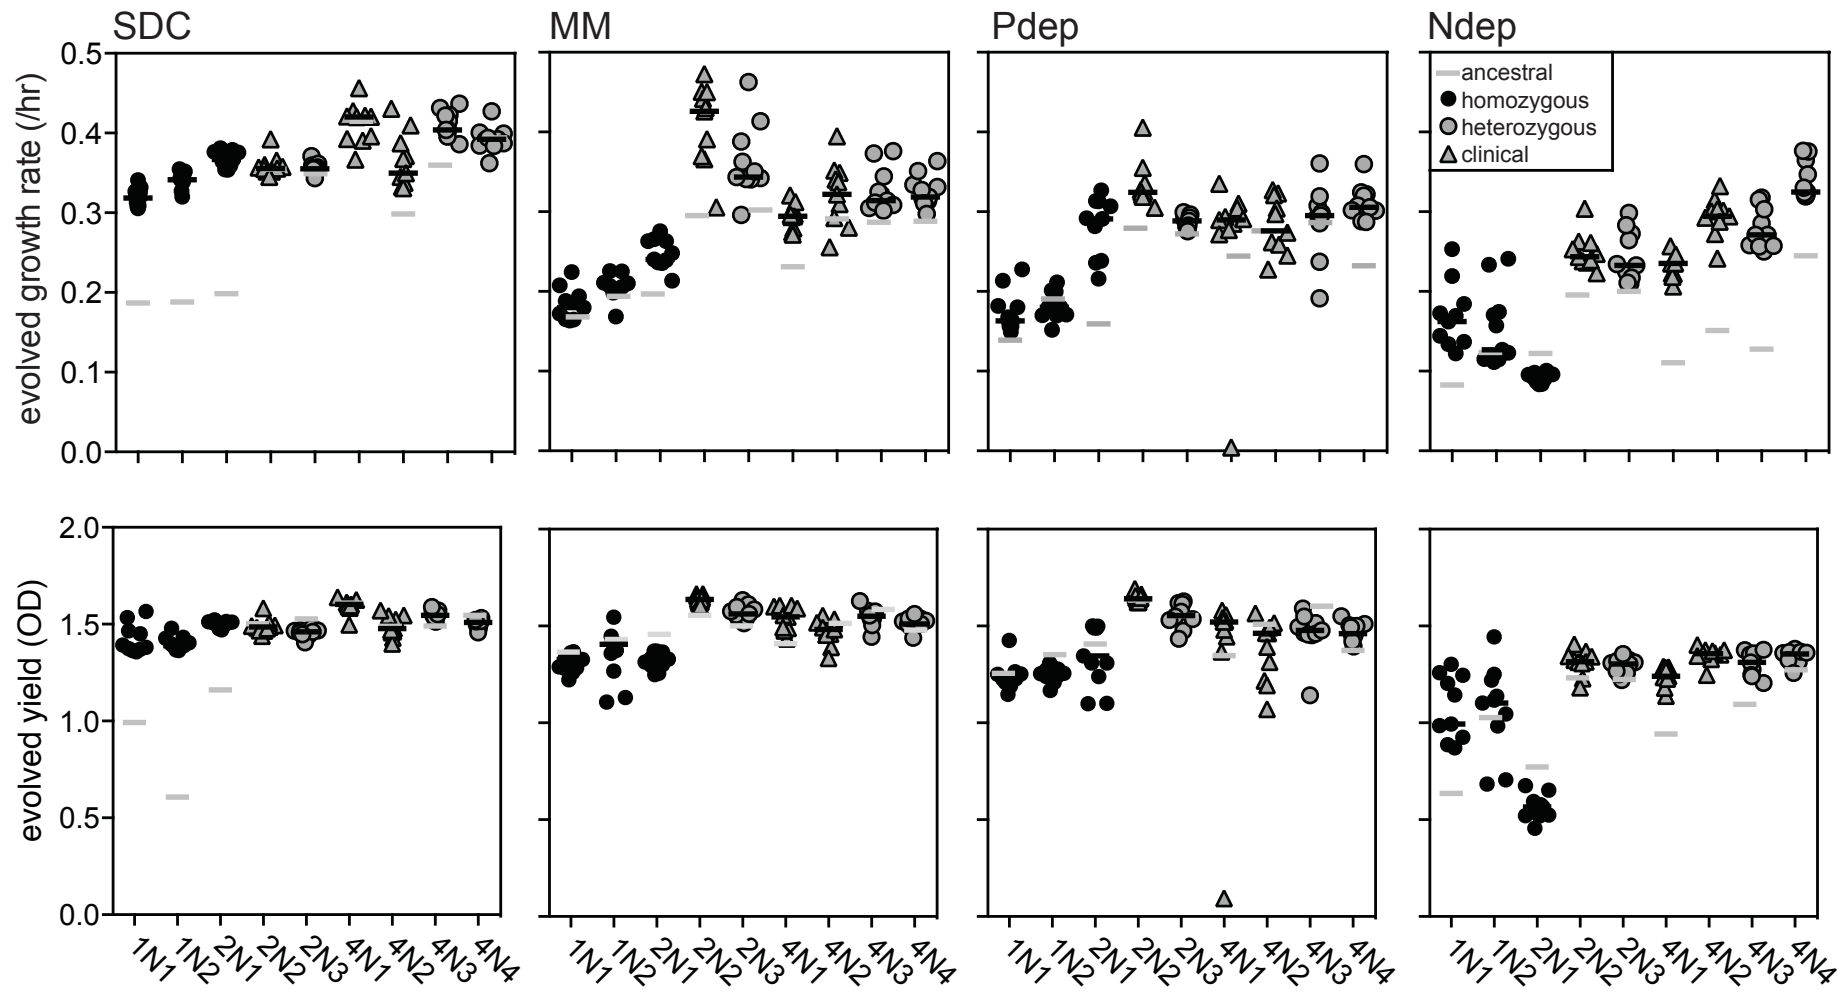

**Figure S2. The majority of evolved lines increased in fitness.** Each point is the evolved growth rate (top panel) and yield (bottom panel) of one of 10 replicate lines evolved for each ancestral strain. Black bars indicate the median of evolved growth rates and yield. Grey bars indicate the mean of ancestral growth rates and yield as presented in Figure 3.
